# Supplementary material
Source: PubMed Central journal article supplement (PMC2717711)
Supplement: bi900640x_si_001.pdf [file bi900640x_si_001.pdf]

## **-Supporting Information-**

### Identification of the Plasticity-Relevant Fucose- $\alpha$ (1-2)-Galactose Proteome from Mouse Olfactory Bulb

*Heather E. Murrey<sup>‡</sup>, Scott B. Ficarro<sup>§ $\perp$</sup> , Chithra Krishnamurthy<sup>‡</sup>, Steven E. Domino<sup>||</sup>, Eric C.  
Peters<sup>§</sup>, and Linda C. Hsieh-Wilson<sup>‡\*</sup>*

<sup>‡</sup>Howard Hughes Medical Institute and Division of Chemistry and Chemical Engineering, California Institute of Technology, Pasadena, CA 91125. <sup>§</sup>Genomics Institute of the Novartis Research Foundation, San Diego, CA 92121. <sup>||</sup>Department of Obstetrics and Gynecology, University of Michigan Medical Center, Ann Arbor, MI 48109.  <sup>$\perp$</sup> Present address: Department of Cancer Biology and Blais Proteomics Center, Dana-Farber Cancer Institute, Department of Biological Chemistry and Molecular Pharmacology, Harvard Medical School, Boston, MA 02115.

\* To whom correspondence should be addressed

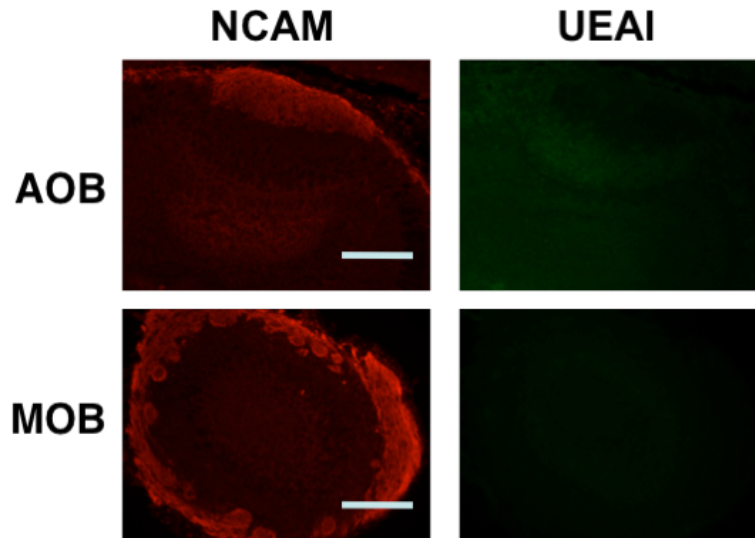

**Figure S1.** FUT1-deficient animals show no detectable fucosylation in the MOB and AOB. The OB of FUT1-deficient mice was cryogenically sectioned into coronal slices and stained with an anti-NCAM antibody (red) and UEAI conjugated to fluorescein (green). No staining of either the ONL, the glomerular layer, or the AOB of FUT1 knockout animals was observed. Scale bar indicates 200  $\mu\text{m}$ .

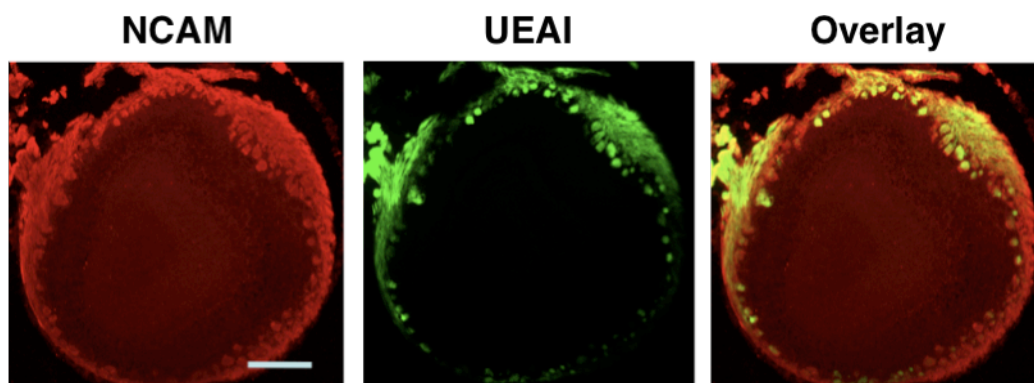

**Figure S2.** NCAM strongly colocalizes with Fuc $\alpha$ (1-2)Gal carbohydrates in the medial aspect of the OB. The OB of wild-type C57BL/6 animals was cryogenically sectioned into coronal slices and stained with an anti-NCAM antibody (red) and UEAI conjugated to fluorescein (green). The overlay (yellow) shows extensive colocalization of NCAM and UEAI staining in the medial aspect of the olfactory bulb. Scale bar indicates 200  $\mu$ m.
